# Supplementary material for: The Effects of Whole-Body Photobiomodulation Light-Bed Therapy on Creatine Kinase and Salivary Interleukin-6 in a Sample of Trained Males: A Randomized, Crossover Study
Source: Front Sports Act Living. 2020 Apr 29;2:48. doi: 10.3389/fspor.2020.00048 (PMC7739664; doi:10.3389/fspor.2020.00048)
Supplement: Supplementary file 3 [file Data_Sheet_3.xlsx]

## Sheet: anthony-ferrara_2019-03-14_to_2
	lnRmssd	lnRmssd	Average Effectiveness	Average Effectiveness	Latency	Latency	Wake episodes	Wake episodes	Mean wake episodes	Mean wake episodes	Wake after sleep onset (WASO)	Wake after sleep onset (WASO)	Awakenings per hour	Awakenings per hour	Quality	Quality	Minutes asleep	Minutes asleep	Efficiency	Efficiency
Ferrara	3.46	3.16	93.55	93.75	13.75	40.75	1.25	2	6.25	6.25	8.75	22.5	0.18	0.34	9	7.75	493.7	483.75	94.03	86
Ridi	3.74	3.54	91.5	96.3	30.3	29.75	3.33	1.5	5.83	6.67	21.6	15	0.4	0.2	7.3	8.5	475	461.2	77.3	86.3
Bolanos	3.7	4	90.9	89.5	42	45.3	3.5	4	8.8	8.6	32.5	35	0.5	0.7	6.5	5.7	405	371.7	83.5	80.7
Fisk	4.1	4	91.5	88.9	25.7	12.7	5.3	4.7	10.8	6.8	55	31.7	0.8	0.7	4.7	5.7	410	401	82.8	89.2
Ghigiarelli	3.8	4.1	95.1	95.3	35.6	21	4	1.3	7.3	7.5	31.6	11.6	0.5	0.18	6.6	8.6	470	442	86.2	91.9
Marinello	3.7	4.1	84	77.3	15.7	10	1	0.3	5	5	5	5	0.2	0.1	9	9.7	369.3	354	92.9	93.2
Canty	5	4.9	92.9	89.2	10	9.5	0.5	2	2.5	5	2.5	10	0.07	0.3	9.5	8	415	372	94.7	91.6
Falotrusso	5.1	5.1	78	77.4	34	16	8.3	12.3	9.8	9.2	83.3	111.6	1.41	2.5	2	1.3	358	305	72.3	67.5
Kern	3.9	4.1	89	89.7	16	5.5	3.6	3	7.6	8.3	28.3	25	0.57	0.45	6.3	7	395	400	88.5	90.7
	4.05556	4.11111	89.6056	88.5944	24.7833	21.1667	3.42	3.45556	7.09778	7.03556	29.8389	29.7111	0.514444	0.607778	6.76667	6.91667	421.222	398.961	85.8033	86.3444
	0.589642	0.597504	5.38438	6.94894	11.3444	14.3364	2.41929	3.58717	2.55111	1.50167	25.9344	32.3178	0.404417	0.741279	2.37276	2.48671	47.8706	56.1701	7.6941	8.05995
