# Supplementary material for: The Effects of Whole-Body Photobiomodulation Light-Bed Therapy on Creatine Kinase and Salivary Interleukin-6 in a Sample of Trained Males: A Randomized, Crossover Study
Source: Front Sports Act Living. 2020 Apr 29;2:48. doi: 10.3389/fspor.2020.00048 (PMC7739664; doi:10.3389/fspor.2020.00048)
Supplement: Supplementary Tables 1, 2 — Reporting the CK and IL-6 values for each individual at the four time points across both conditions. It also reports the AUC and percent change calculation for each participant and the groups. [file Data_Sheet_2.xlsx]

## Sheet: AUC's
ID		CONTROL	NOVOTHOR				0	IPE	30	60
1	A. Ferrara	313.95	191.76			Ghigiarelli	0.43	1.02	1.58	1.43
2	C. Caridi	401.76	348.6			Ferrara	2.63	3.1	2.6	1.95
3	K. Bolanos	298.68	218.76			Marinello	1.3	1.86	2.48	1.61
4	A. Fisk	305.88	437.76			Bolanos	1.36	4.21	1.78	4.89
5	J. Ghigiarelli	161.52	81.72			Falotrusso	80.77	63.71	41.77	37.2
6	C. Marinello	129.12	139.08			Canty	4.44	5.9	5.19	2.33
7	M. Canty	300.48	347.4			Fisk	1.88	8.38	6.76	4.32
8	A. Falotrusso					Castma	2.63	5.87	7.06	2.27
9	R. Castma	411.72	369.12			Petersen	1.01	4.04	2.43	1.84
10	T. Petersen	191.16	189.48			Azulay	9.06	2.63	5.73	5.57
11	A. Azulay	388.92	376.2			Ridi	2.48	4.05	6.32	5.83
12	M. Kern	1293	1097.6			Kern	7.07	24.33	12.89	10.02
		CONTROL	NOVOTHOR				0	IPE	30	60
						Ghigiarelli	1.22	2.51	2.83	1.56
						Ferrara	3.89	2.03	2.83	1.4
						Marinello	1.61	1.52	1.99	2.13
						Bolanos	2.07	4.14	5.7	3.14
						Falotrusso	31.61	31.5	30.95	32.16
						Canty	2.26	5.29	4.7	2.8
						Fisk	3.19	6.46	2.65	4.08
						Castma	2.53	9.68	5.13	2.16
						Petersen	1.49	3.72	2.16	2.68
						Azulay	3.48	5.59	6.37	5.01
						Ridi	3.05	7.4	6.39	2.85
						Kern	6.65	27	18.33	10.51
	Ferrara					Ferrara
	3.89	0		177.6		2.63	0		68.76	3.89	2.03	2.83	1.4
	2.03	60		72.9		3.1	24		68.4
	2.83	90		63.45		2.6	48		54.6
	1.4	120				1.95	72
	AUC			313.95		AUC			191.76
	C. Caridi					C. Caridi				2.48	4.05	6.32	5.83
	3.05	0		125.4		2.48	0		78.36	3.05	7.4	6.39	2.85
	7.4	24		165.48		4.05	24		124.44
	6.39	48		110.88		6.32	48		145.8
	2.85	72				5.83	72
	AUC			401.76		AUC			348.6
	K. Bolanos					K. Bolanos				1.36	4.21	1.78	4.89
	2.07	0		74.52		1.36	0		66.84	2.07	4.14	5.7	3.14
	4.14	24		118.08		4.21	24		71.88
	5.7	48		106.08		1.78	48		80.04
	3.14	72				4.89	72
	AUC			298.68		AUC			218.76
	A. Fisk					A. Fisk				1.88	8.38	6.76	4.32
	3.19	0		115.8		1.88	0		123.12	3.19	6.46	2.65	4.08
	6.46	24		109.32		8.38	24		181.68
	2.65	48		80.76		6.76	48		132.96
	4.08	72				4.32	72
	AUC			305.88		AUC			437.76
	J. Ghigiarelli					J. Ghigiarelli				0.43	1.02	1.58	1.43
	1.22	0		44.76		0.43	0		17.4	1.22	2.51	2.83	1.56
	2.51	24		64.08		1.02	24		31.2
	2.83	48		52.68		1.58	48		36.12
	1.56	72				1.43	72
	AUC			161.52		AUC			84.72
	C. Marinello					C. Marinello				1.3	1.86	2.48	1.61
	1.61	0		37.56		1.3	0		37.92	1.61	1.52	1.99	2.13
	1.52	24		42.12		1.86	24		52.08
	1.99	48		49.44		2.48	48		49.08
	2.13	72				1.61	72
	AUC			129.12		AUC			139.08
	M. Canty					M. Canty				4.44	5.9	5.19	2.33
	2.26	0		90.6		4.44	0		124.08	2.26	5.29	4.7	2.8
	5.29	24		119.88		5.9	24		133.08
	4.7	48		90		5.19	48		90.24
	2.8	72				2.33	72
	AUC			300.48		AUC			347.4
	A.Falotrusso					A.Falotrusso				80.77	63.71	41.77	37.2
	31.61	0		757.32		80.77	0		1733.64	31.61	31.5	30.95	32.16
	31.5	24		750		63.7	24		1266
	31	48		758.4		41.8	48		948
	32.2	72				37.2	72
	AUC			2265.72		AUC			3947.64
	R. Castma					R. Castma				2.63	5.87	7.06	2.27
	2.53	0		146.52		2.63	0		102	2.53	9.68	5.13	2.16
	9.68	24		177.72		5.87	24		155.16
	5.13	48		87.48		7.06	48		111.96
	2.16	72				2.27	72
	AUC			411.72		AUC			369.12
	T. Petersen					T. Petersen				1.01	4.04	2.43	1.84
	1.49	0		62.52		1.01	0		60.6	1.49	3.72	2.16	2.68
	3.72	24		70.56		4.04	24		77.64
	2.16	48		58.08		2.43	48		51.24
	2.68	72				1.84	72
	AUC			191.16		AUC			189.48
	A. Azulay					A. Azulay				9.06	2.63	5.73	5.57
	3.48	0		108.84		9.06	0		140.28	3.48	5.59	6.37	5.01
	5.59	24		143.52		2.63	24		100.32
	6.37	48		136.56		5.73	48		135.6
	5.01	72				5.57	72
	AUC			388.92		AUC			376.2
	M. Kern					M. Kern				7.07	24.33	12.89	10.02
	6.65	0		403.8		7.07	0		376.44	6.65	27	18.33	10.51
	27	24		543.6		24.3	24		446.4
	18.3	48		345.6		12.9	48		274.8
	10.5	72				10	72
				1293					1097.64
